# Supplementary material for: High-temperature solvothermal synthesis and magnetic properties of nearly monodisperse CdCr2S4 nanocrystals
Source: Royal Society of Chemistry journal article supplement (doi:10.1039/c5tc02727f), 2015-01-01
Supplement: c5tc02727f1.pdf [file c5tc02727f1.pdf]

## High-temperature Solvothermal Synthesis and Magnetic Properties of Nearly Monodisperse CdCr<sub>2</sub>S<sub>4</sub> Nanocrystals

Chao Pang,<sup>a</sup> Ling Gao,<sup>a</sup> Anurag Chaturvedi,<sup>b</sup> Ningzhong Bao,<sup>a</sup> Kazumichi Yanagisawa,<sup>c</sup> Liming Shen,<sup>\*a</sup> and Arunava Gupta<sup>\*b</sup>

<sup>a</sup>State Key Laboratory of Materials-Oriented Chemical Engineering, Nanjing Tech University (Former Name: Nanjing University of Technology), Nanjing, Jiangsu 210009, P. R. China; <sup>b</sup>Center for Materials for Information Technology (MINT), The University of Alabama, Tuscaloosa, Alabama 35487, United States; <sup>c</sup>Research Laboratory of Hydrothermal Chemistry, Faculty of Science, Kochi University, Kochi 780-8520, Japan

### Content

|                                                        |       |
|--------------------------------------------------------|-------|
| Table S1 -----                                         | S2-S3 |
| Table S2 -----                                         | S4    |
| Figure S1-----                                         | S5    |
| Table S3 -----                                         | S5    |
| Figure S2-----                                         | S6    |
| Figure S3-----                                         | S6    |
| Figure S4-----                                         | S7    |
| Figure S5-----                                         | S7    |
| Study on the solubility of Cd/Cr chlorides in ODE----- | S8-S9 |
| Figure S6-----                                         | S8    |
| Figure S7-----                                         | S9    |
| Figure S8-----                                         | S9    |
| Figure S9-----                                         | S10   |
| Langevin fits -----                                    | S10   |
| Figure S10-----                                        | S10   |
| References-----                                        | S11   |

**Table S1.** List of publications describing synthesis routes of CdCr<sub>2</sub>S<sub>4</sub>.

| Refs        | Raw materials                                                                                     | Synthesis route and conditions                                                                                         | Products                                               |
|-------------|---------------------------------------------------------------------------------------------------|------------------------------------------------------------------------------------------------------------------------|--------------------------------------------------------|
| This work   | CdCl <sub>2</sub> ,<br>CrCl <sub>3</sub> ·6H <sub>2</sub> O, 1-<br>DDT                            | Solvothermal method<br>Reacted at 375 °C for 72 h                                                                      | Nanocrystals<br>Spherical, average size: 8.0±1.5<br>nm |
| 2, 7,<br>12 | Polycrystalline<br>CdCr <sub>2</sub> S <sub>4</sub> , Br <sub>2</sub>                             | Chemical transport reaction<br>Transported at 850 °C and annealed<br>in vacuum at 500-700 °C for 0.5-2 h               | Single crystals<br>Octahedral, edge length: ~2 mm      |
| 4           | Polycrystalline<br>CdCr <sub>2</sub> S <sub>4</sub> , TeBr <sub>4</sub>                           | Chemical transport reaction<br>Grown at 850-900 °C, 10 <sup>-3</sup> mbar for<br>3-4 weeks                             | Single crystals<br>Octahedral, edge length: ~3 mm      |
| 9, 11       | Synthesized<br>CdCr <sub>2</sub> S <sub>4</sub><br>powder, Cl <sub>2</sub> ,<br>CrCl <sub>3</sub> | Chemical transport reaction<br>Deposited at 850-900 °C, 10 <sup>-6</sup> Torr                                          | Single crystals                                        |
| 1, 6        | Polycrystalline<br>CdCr <sub>2</sub> S <sub>4</sub> , CrCl <sub>3</sub>                           | Chemical vapor transport                                                                                               | Single crystals                                        |
| 18          | CdS, Cr <sub>2</sub> S <sub>3</sub>                                                               | Physical vapor deposition<br>Deposited at 670-900 °C, 2×10 <sup>-5</sup> Torr<br>for several hours                     | Polycrystalline films<br>5840-8170 Å in thickness      |
| 19          | Cd, CrCl <sub>3</sub> , S <sub>2</sub> ,<br>He                                                    | Open-tube vapor-phase technique<br>Deposited at 740 °C for 2 h                                                         | Single crystal films<br>1-2 μm in thickness            |
| 21          | Polycrystalline<br>CdCr <sub>2</sub> S <sub>4</sub> , Cl <sub>2</sub>                             | Closed-tube vapor transport<br>Deposited at 775-825 °C for 60-80 h                                                     | Single crystals                                        |
| 3           | CdS, Cr, S                                                                                        | Solid state reaction                                                                                                   | Polycrystals                                           |
| 5, 10       | Cd, Cr, S                                                                                         | Solid-state synthesis method<br>Heated from 450 to 850 °C and<br>maintained at 850 °C for 1 week<br>Annealed at 800 °C | Polycrystals                                           |
| 20          | CdS, CrCl <sub>3</sub>                                                                            | Solid state reaction<br>Reacted at 900 °C, 10 <sup>-4</sup> Torr for 3-4<br>days                                       | Single crystals                                        |

|    |                                                                                                       |                                                                                                                                                                     |                                                                                                                           |
|----|-------------------------------------------------------------------------------------------------------|---------------------------------------------------------------------------------------------------------------------------------------------------------------------|---------------------------------------------------------------------------------------------------------------------------|
| 17 | CdS, Cr, S                                                                                            | Solid state sintering<br>Heated at 780 °C for 4 days,<br>Sintered at 620 °C for 30 min in<br>vacuum at 4500 kg·cm <sup>-2</sup> ,<br>Annealed at 600 °C for 10 days | Crystals                                                                                                                  |
| 8  | Cr <sub>2</sub> O <sub>3</sub> , CdSO <sub>4</sub> ,<br>Na <sub>2</sub> S <sub>2</sub> O <sub>3</sub> | Electrochemical deposition<br>Deposited at 80 °C for 45 min at pH<br>= 3.5-6.5 at deposition potential of -<br>550 ~ -850 mV (versus SCE)                           | Smooth thin films<br>1000-1500 nm in thickness,<br>spherical grains with an average<br>size of 0.16 μm                    |
| 16 | CdSO <sub>4</sub> , CrO <sub>3</sub> ,<br>Na <sub>2</sub> S <sub>2</sub> O <sub>3</sub>               | Electrochemical deposition<br>Deposited at RT for 90 min at<br>current densities of 15-20 mA·cm <sup>-2</sup>                                                       | Thin films<br>Coarse particle-covered surfaces,<br>overgrowth of particles                                                |
| 13 | CdCl <sub>2</sub> , CrO <sub>3</sub> ,<br>(NH <sub>2</sub> ) <sub>2</sub> CS                          | Chemical bath deposition<br>Reacted at 70 °C for 30-90 min at<br>pH=10±0.2 using Na <sub>2</sub> EDTA as<br>complexing agent                                        | Thin films<br>110-224 nm in thickness,<br>elongated spherical grains with<br>~50 nm in width and ~300-400<br>nm in length |
| 14 | CdCl <sub>2</sub> , CrO <sub>3</sub> ,<br>(NH <sub>2</sub> ) <sub>2</sub> CS                          | Chemical bath deposition<br>Reacted at 80 °C for 2-3 h at pH=10<br>using N <sub>2</sub> H <sub>4</sub> ·H <sub>2</sub> O as reducing agent                          | Polycrystalline thin films<br>~200 nm in thickness                                                                        |
| 15 | CdCl <sub>2</sub> , CrO <sub>3</sub> ,<br>(NH <sub>2</sub> ) <sub>2</sub> CS                          | Chemical bath deposition<br>Reacted at >80 °C for 1-2 h at<br>pH=10                                                                                                 | Thin films<br>0.7 μm in thickness                                                                                         |

**Table S2.** Physicochemical characteristics of solid state synthesized  $\text{CuCr}_2\text{Se}_4$ ,  $\text{CuCr}_2\text{S}_4$ , and  $\text{CdCr}_2\text{S}_4$ . (Ref. 1-28)

| Materials                  | Electron configuration     |                                  | Lattice parameter (Å) | Curie Temperature (K) | Conductivity            | Micro-hardness ( $\text{kg}\cdot\text{mm}^{-2}$ ) | Single crystal growth temperature by chemical vapor transport ( $^{\circ}\text{C}$ ) | Decomposition temperature (K) |        |
|----------------------------|----------------------------|----------------------------------|-----------------------|-----------------------|-------------------------|---------------------------------------------------|--------------------------------------------------------------------------------------|-------------------------------|--------|
|                            | A site                     | Cr site                          |                       |                       |                         |                                                   |                                                                                      | In vacuum                     | In air |
| $\text{CuCr}_2\text{Se}_4$ | $\text{Cu}^{1+}: e^4t_2^6$ | $\text{Cr}^{3.5+}: t_{2g}^{2.5}$ | 10.34                 | 430                   | metallic                | 240                                               | ~900                                                                                 | 805                           | 770    |
| $\text{CuCr}_2\text{S}_4$  | $\text{Cu}^{1+}: e^4t_2^6$ | $\text{Cr}^{3.5+}: t_{2g}^{2.5}$ | 9.81                  | 377                   | metallic                | 396                                               | ~850                                                                                 | 870                           | 800    |
| $\text{CdCr}_2\text{S}_4$  | $\text{Cd}^{2+}: e^4t_2^6$ | $\text{Cr}^{3+}: t_{2g}^3$       | 10.24                 | 84.5                  | n-type<br>$E_g=1.57$ eV | 450                                               | ~830                                                                                 | 801                           | 1073   |

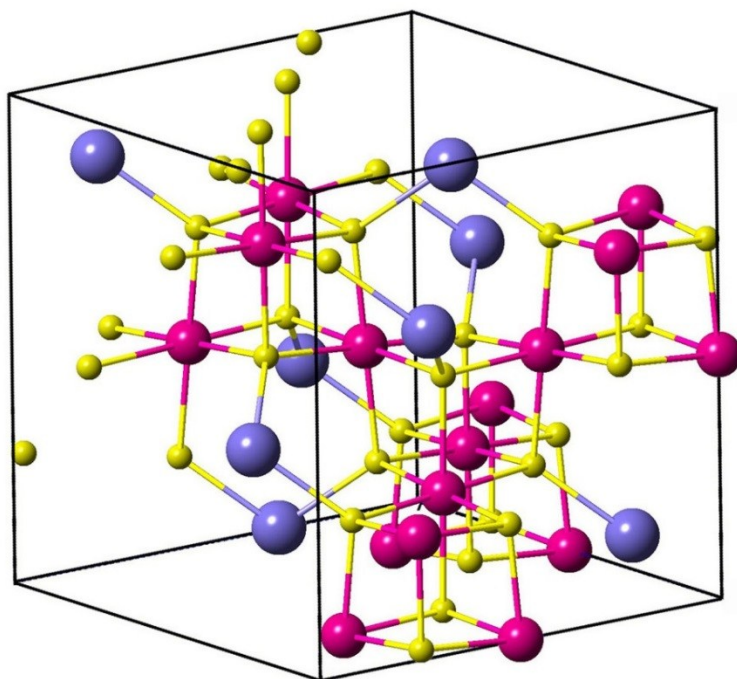

**Figure S1.** Representative crystal structure of spinel  $\text{CdCr}_2\text{S}_4$  (Cd, blue; Cr, pink; S, yellow).

**Table S3.** ICP-OES analysis of the synthesized  $\text{CdCr}_2\text{S}_4$  nanocrystals.

| Analyte    | Mean Corrected Intensity | Sample Conc. Units | Std. Dev. | RSD   | Atomic % |
|------------|--------------------------|--------------------|-----------|-------|----------|
| Cr 267.716 | 31679.2                  | 7.423 mg/L         | 0.0222    | 0.30% | 67.38%   |
| Cd 228.802 | 25678.5                  | 7.767 mg/L         | 0.0126    | 0.16% | 32.62%   |

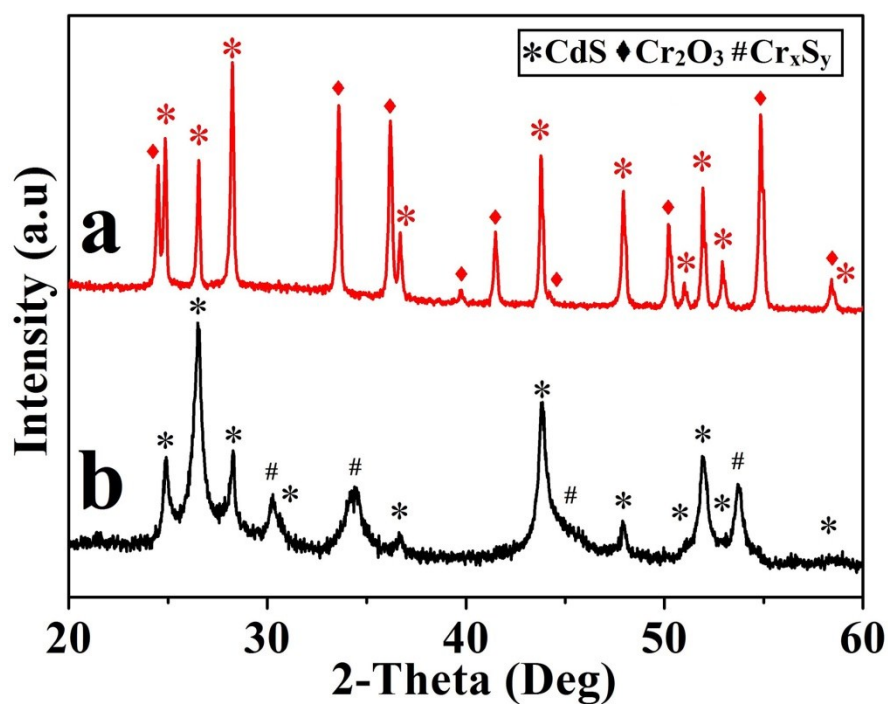

**Figure S2.** XRD patterns of the products prepared using (a) Cd/Cr sulfates and (b) Cd/Cr acetates as reactants.

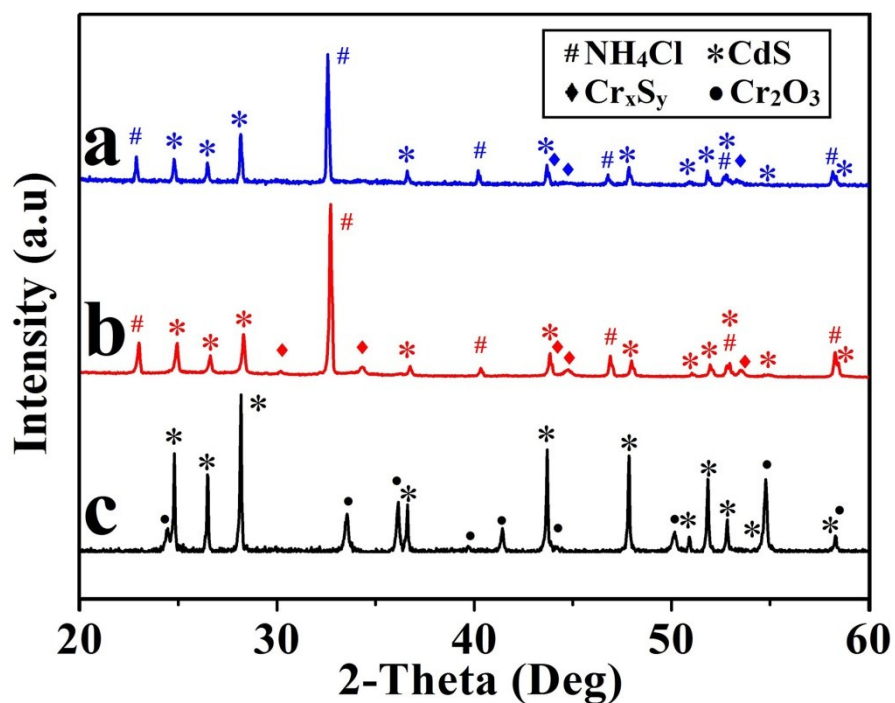

**Figure S3.** XRD patterns of the products prepared in the solvents (a) oleylamine, (b) octadecylamine, and (c) oleic acid.

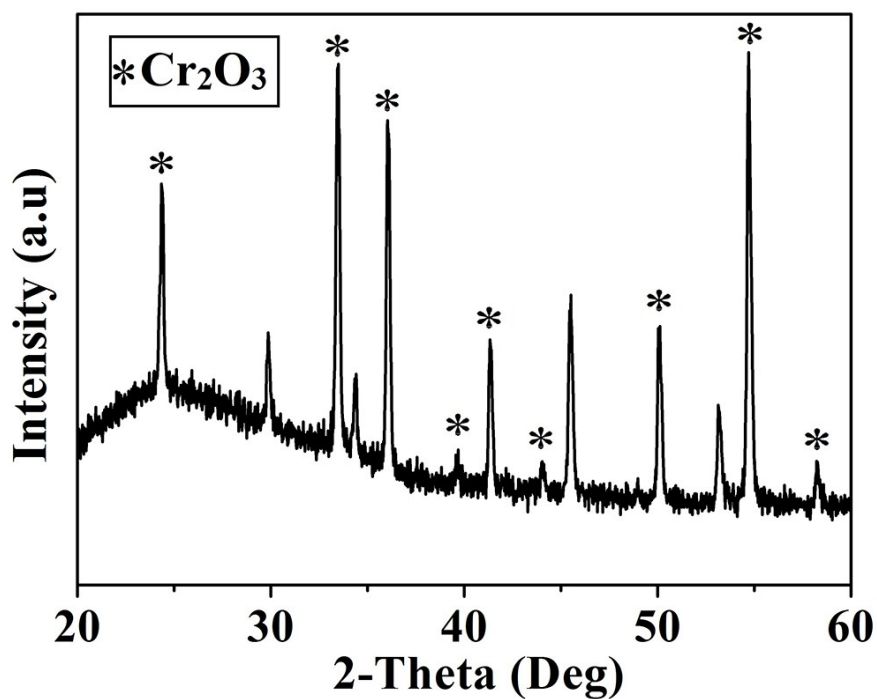

**Figure S4.** XRD pattern of the products obtained from the reaction of elemental sulfur with cadmium and chromium complexes.

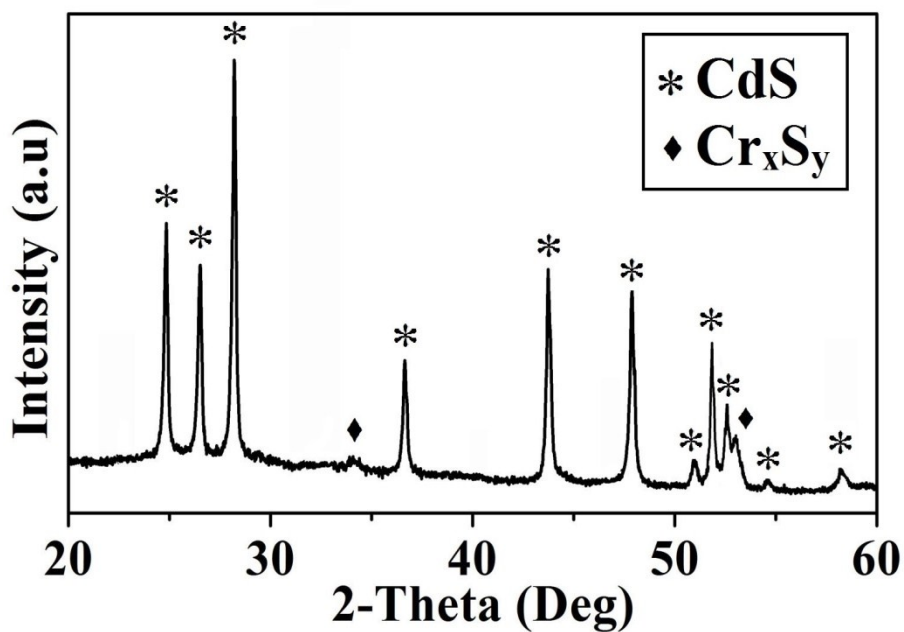

**Figure S5.** XRD pattern of the products obtained by hot-injection method in an open system at 375 °C in octadecylamine.

### Study on the solubility of Cd/Cr chlorides in ODE

In Flask 1, 0.5 mmol  $\text{CdCl}_2$  was added to 30 mL ODE, deaerated at room temperature for 15 min, and then back-filled with nitrogen for 50 min (Figure S6a). Flask 1 was then heated to 315 °C (boiling point of ODE) with stirring under  $\text{N}_2$  atmosphere. The mixture in Flask 1 gradually turned to a white color during heating and eventually became milky white after being heated at 315 °C for 1 h (Figure S6b). Flask 1 was allowed to cool to room temperature after heating. After sitting overnight, clear and transparent ODE solvent was separated from the white powder settling down at the flask bottom (Figure S6c).

In Flask 2, 1.0 mmol  $\text{CrCl}_3 \cdot 6\text{H}_2\text{O}$  was added to 30 mL ODE, deaerated at room temperature for 15 min, and then back-filled with nitrogen for 50 min (Figure S6d). Flask 2 was then heated to 315 °C (boiling point of ODE) with stirring under  $\text{N}_2$  atmosphere. With increasing the temperature to ~90 °C,  $\text{CrCl}_3 \cdot 6\text{H}_2\text{O}$  (melting point of 83 °C) began to melt and formed liquid drops at the bottom of the flask, with the solvent remaining clear and transparent (Figure S6e). With further increasing the temperature, the droplets at the bottom became grey after being heated at 315 °C for 1 h (Figure S6f), due to the release of the water of crystallization in  $\text{CrCl}_3 \cdot 6\text{H}_2\text{O}$ . This mixture remained the same as that shown in Figure S6f, while cooled to room temperature.

The solvents obtained from Flask 1 after sitting at RT overnight (Figure S6c), Flask 2 at 90 °C (Figure S6e), Flask 2 after cooling down (Figure S6f), and pure ODE were studied using FTIR. As seen in Figure S7, no significant differences are observed amongst the spectra of the four solvents. This indicates that  $\text{CdCl}_2$  can dissolve in ODE at high temperatures, while  $\text{CrCl}_3 \cdot 6\text{H}_2\text{O}$  barely dissolved in ODE. A further PXRD study (Figure S8) confirmed that the solid products obtained from the bottom of Flask 1 after sitting at RT overnight (Figure S6c), Flask 2 at 90 °C (Figure S6e), Flask 2 after cooling down (Figure S6f) are pure  $\text{CdCl}_2$ ,  $\text{CrCl}_3 \cdot 6\text{H}_2\text{O}$ , and  $\text{CrCl}_3$ , respectively.

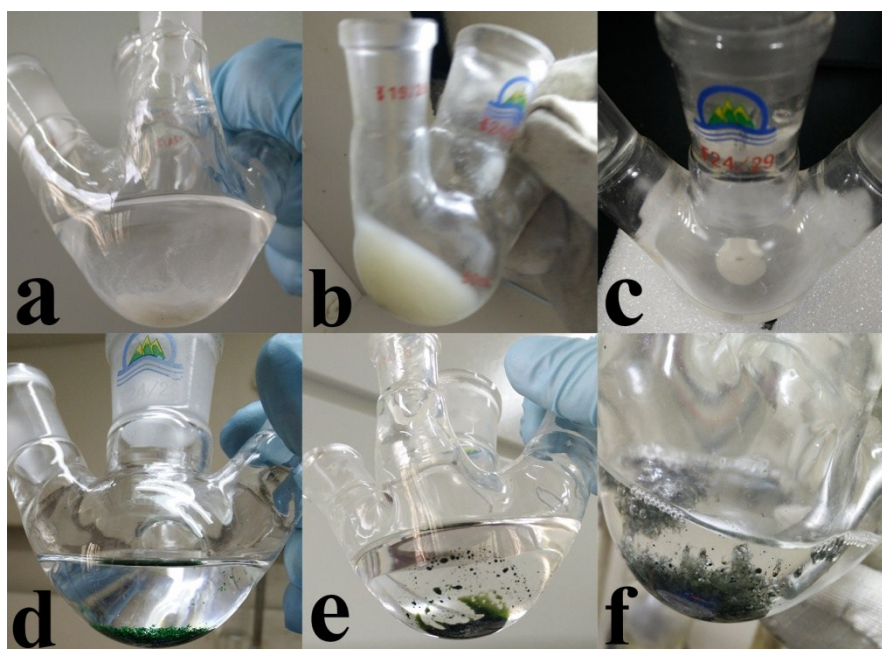

**Figure S6.** Digital photographs of the  $\text{CdCl}_2$  and ODE mixture (a) before heating, (b) after being heated at 315 °C for 1 h, and (c) after sitting overnight at RT. Digital photographs of the  $\text{CrCl}_3 \cdot 6\text{H}_2\text{O}$  and ODE mixture (d) before heating, (e) after being heated at 90 °C, and (f) after being heated at 315 °C for 1 h.



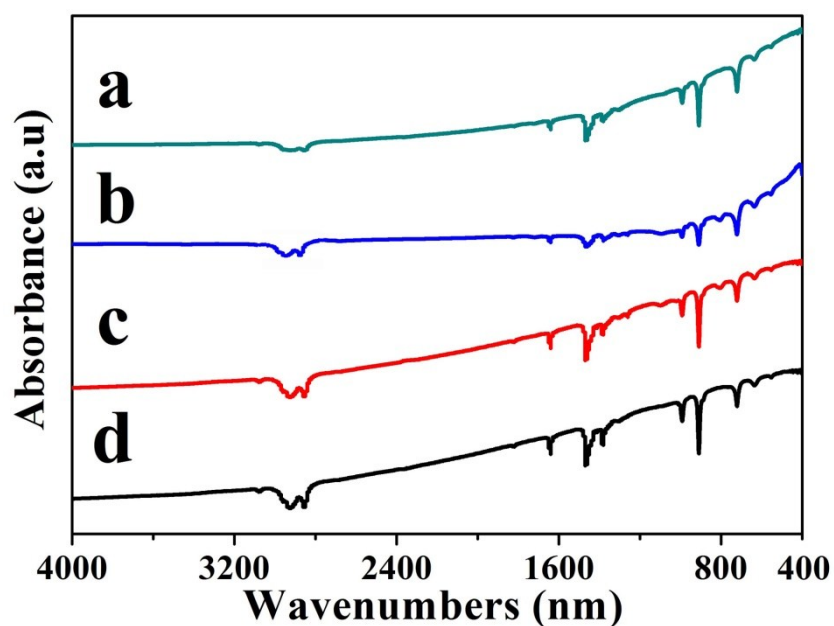

**Figure S7.** FTIR spectra of the solvents obtained from (a) Flask 1 after sitting overnight at RT (Figure S7c), (b) Flask 2 at 90 °C (Figure S7e), (c) Flask 2 after cooling down (Figure S7f), and (d) pure ODE.

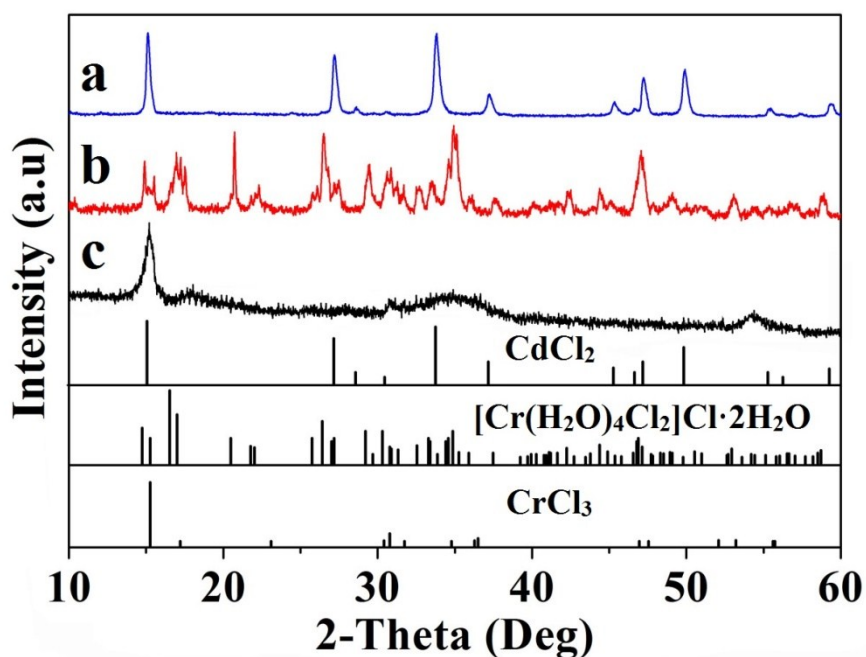

**Figure S8.** XRD patterns of the solid products obtained from the bottom of (a) Flask 1 after sitting overnight at RT (Figure S7c), (b) Flask 2 at 90 °C (Figure S7e), (c) Flask 2 after cooling down (Figure S7f).

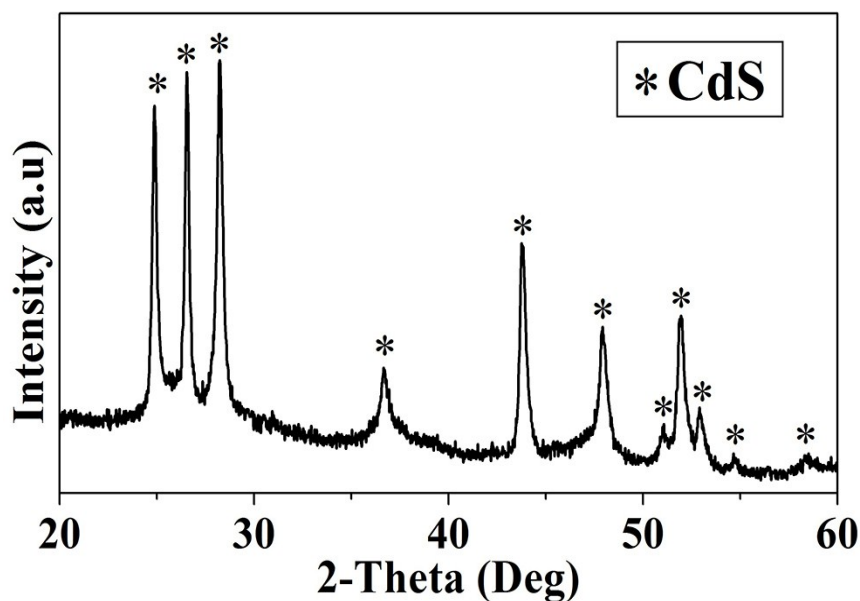

**Figure S9.** XRD pattern of the product prepared at 370 °C in octadecylamine by solvothermal method with a very-slow heating rate.

**Magnetization (M) versus applied field (H) data plot for the CdCr<sub>2</sub>S<sub>4</sub> nanocrystals measured at 5 K along with fitted Langevin function<sup>29</sup>:**  $M = C_1[\coth(C_2H) - (1/C_2H)] + C_3H$ , where  $C_1$  is the saturation magnetization, in emu/gm,  $C_2 = (\mu/k_B T)$ , and  $C_3$  is a constant accounting for the paramagnetic background contribution. From the fittings, we obtain  $C_1 = 19$  emu/g,  $C_2 = 1.54125$ , and  $C_3 = 0.00738$  for the CdCr<sub>2</sub>S<sub>4</sub> nanocrystals (Adjusted R-Square = 0.99766). From the value of  $\mu$  (emu) and the calculated volumes, assuming cubic shape particles, we determine the average size of the nanoparticles to be 17 nm.

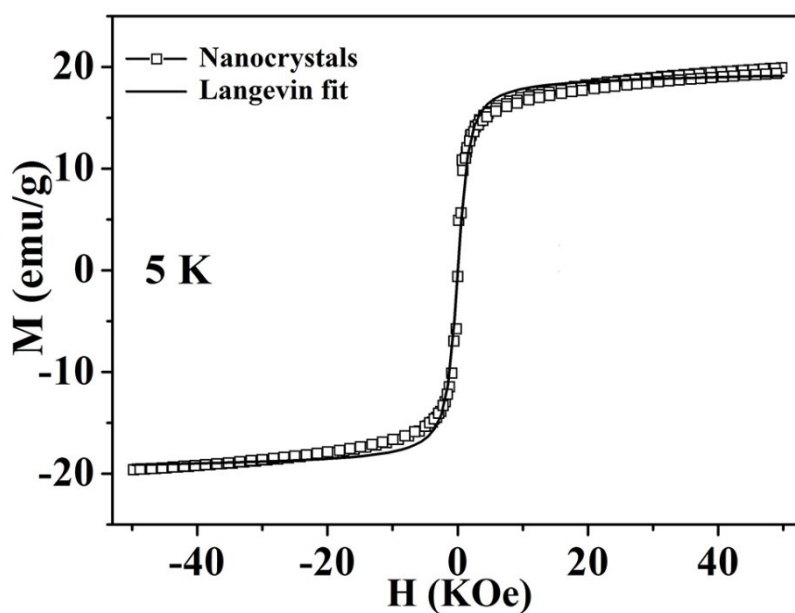

**Figure S10.** Magnetization (M) versus applied field (H) at 5 K along with the fitted Langevin function for CdCr<sub>2</sub>S<sub>4</sub> nanoparticles.

## References

- (1) Kitani, S.; Tachibana, M.; Kawaji, H. *Solid State Commun.* **2014**, *179*, 16.
- (2) Tsurkan, V.; Ehlers, D.; Felea, V.; Krug von Nidda, H.-A.; Loidl, A. *Phys. Rev. B* **2013**, *88*, 144417.
- (3) Hartmann, O.; Kalvius, G. M.; Wappling, R.; Gunther, A.; Tsurkan, V.; Krimmel, A.; Loidl, A. *Eur. Phys. J. B* **2013**, *86*, 148.
- (4) Ehlers, D.; Tsurkan, V.; Krug von Nidda, H.-A.; Loidl, A. *Phys. Rev. B* **2012**, *86*, 174423.
- (5) Xie, Y. M.; Yang, Z. R.; Li, L.; Yin, L. H.; Hu, X. B.; Huang, Y. L.; Jian, H. B.; Song, W. H.; Sun, Y. P.; Zhou, S. Q.; Zhang, Y. H. *J. Appl. Phys.* **2012**, *112*, 123912
- (6) Tachibana, M.; Taira, N.; Kawaji, H. *Solid State Commun.* **2011**, *151*, 1776.
- (7) Gnezdilov, V.; Lemmens, P.; Pashkevich, Y. G.; Payen, C.; Choi, K. Y.; Hemberger, J.; Loidl, A.; Tsurkan, V. *Phys. Rev. B* **2011**, *84*, 045106.
- (8) Mahalingam, T.; Thanikaikarasan, S.; Dhanasekaran, V.; Mariappan, R.; Jayamurugan, P.; Velumani, S.; Rhee, J. K. *Mater. Sci. Eng. B* **2010**, *174*, 249.
- (9) Sun, C. P.; Lin, C. C.; Her, J. L.; Ho, C. J.; Taran, S.; Berger, H.; Chaudhuri, B. K.; Yang, H. D. *Appl. Phys. Lett.* **2010**, *96*, 122109.
- (10) Luo, X.; Yang, Z. R.; Sun, Y. P.; Zhu, X. B.; Song, W. H.; Dai, J. M. *J. Appl. Phys.* **2009**, *106*, 113920.
- (11) Sun, C. P.; Huang, C. L.; Lin, C. C.; Her, J. L.; Ho, C. J.; Lin, J.-Y.; Berger, H.; Yang, H. D. *Phys. Rev. B* **2009**, *79*, 214116.
- (12) Krohns, S.; Schrettle, F.; Lunkenheimer, P.; Tsurkan, V.; Loidl, A. *Physica B* **2008**, *403*, 4224.
- (13) Todkara, V. V.; Manea R. S.; Lokhande, C. D.; Pathanb, H. M.; Joob, O. S.; Chunga, H.; Yoona, M. Y.; Han, S. H. *J. Phys. Chem. Solids* **2008**, *69*, 1802.
- (14) Salem, A. M.; El-Ghazzawi, M. E. *Semicond. Sci. Technol.* **2004**, *19*, 236.
- (15) Mane, R. S.; Sankapal, B. R.; Gadave, K. M.; Lokhande, C. D. *Mater. Res. Bull.* **1999**, *34*, 2035.
- (16) Lade, S. J.; Uplane, M. M.; Uplane, M. D.; Lokhande, C. D. *Mater. Chem. Phys.* **1998**, *53*, 185.
- (17) Wakamura, K.; Arai, T. *J. Appl. Phys.* **1988**, *63*, 5824.
- (18) Tsukahara, S.; Satoh, T.; Tsushima, T. *J. Cryst. Growth* **1974**, *24/25*, 158.
- (19) Berger, S. B.; Ekstrom, L. *Phys. Rev. Lett.* **1969**, *23*, 1499.
- (20) Von Neida, A. R.; Shick, L. K. *J. Appl. Phys.* **1969**, *40*, 1013.
- (21) Harbeke, G.; Pinch, H. *Phys. Rev. Lett.* **1966**, *17*, 1090.
- (22) Fedorov, V. A.; Kesler, Y. A.; Zhukov, E. G. *Inorg. Mater.* **2003**, *39*, S68.
- (23) Hill, R. J.; Craig, J. R.; Gibbs, G. V. *Phys. Chem. Miner.* **1979**, *4*, 317.
- (24) Radaustan, S. I. *II Nuovo Cimento D* **1983**, *2*, 1782.
- (25) Belyaev, V. K.; Nikiforov, K. G.; Kadautsan, S. I.; Bazakut, V. A. *Cryst. Res. Technol.* **1989**, *24*, 371.
- (26) Reznitskya, L. Z.; Sklyarova, E. V.; Ushchapovskayaa, Z. F.; Suvorovab, L. F.; Polekhovskyc, Yu. S.; Dzerzanovskyd, P.; Barasha, I. G. *Geol. Ore Deposit* **2011**, *53*, 758.
- (27) Diefallah, E.-H. M.; Obaid, A. Y.; Samarkandy, A. A.; Badei, M. M. A.; El-Bellihi, A. A. *J. Solid State Chem.* **1995**, *117*, 122.
- (28) Kesler, Y. A.; Zhukov, E. G.; Filimonov, D. S.; Polulyak, E. S.; Menshchikova, T. K.; Fedorov, V. A. *Inorg. Mater.* **2005**, *41*, 914.
- (29) Cullity, B. D. *Introduction to Magnetic Materials*; Addison-Wesley: Reading, MA, 1972.
